# Supplementary material for: Exome sequencing uncovers phenotypic and genotypic heterogeneity in 198 Indian families evaluated for autoinflammatory disorders
Source: Research Square preprint supplement (doi:10.21203/rs.3.rs-7634112/v1), 2025-10-03
Supplement: Supplementary file 1 [file 0146feb9c56ec0b7a9b2ea8a.xlsx]

## Sheet: Table 2
Table S1. IUIS classification of the diagnosed families in the cohort (n=61)
Group of disorders (Number of families, %)	Gene	Disorders (Number of families)	OMIM	Zygosity	Inheritance pattern
Defects affecting the inflammasome (9/61, 15% )	PMVK	PMVK-associated autoinflammatory disorder (1)	NA	Homozygous	Autosomal recessive
	MVK	Hyper-IgD syndrome (4)	260920	Heterozygous	Autosomal dominant
	RIPK1	Autoinflammation with episodic periodic fever and lymphadenopathy (1)	618852	Heterozygous	Autosomal dominant
	NLRP12	NLRP12-associated autoinflammatory disease (1)	611672	Heterozygous	Autosomal dominant
	NLRP3	NLRP3-related autoinflammatory disease (2)	120100	Heterozygous	Autosomal dominant
Type I interferonopathies (11/61; 18%)	DNASE1L3	Systemic lupus erythematosus 16 (1)	614420	Homozygous	Autosomal recessive
	ADA2	Vasculitis, autoinflammation, immunodeficiency, and hematologic defects syndrome (8)	615688	Homozygous	Autosomal recessive
	ACP5	Spondyloenchondrodysplasia with immune dysregulation (1)	607944	Homozygous	Autosomal recessive
	DNASE2	Autoinflammatory-pancytopenia syndrome (1)	619858	Homozygous	Autosomal recessive
Non-inflammasome-related conditions (14/61, 23%)	LPIN2	Majeed syndrome (2)	609628	Homozygous	Autosomal recessive
	IL1RN	Chronic recurrent multifocal osteomyelitis 2, with periostitis and pustulosis (1)	612852	Homozygous	Autosomal recessive
	NOD2	Blau syndrome (5)	186580	Heterozygous	Autosomal dominant
	SLC29A3	Histiocytosis-lymphadenopathy plus syndrome (2)	602782	Homozygous	Autosomal recessive
	IL36RN	Psoriasis 14, pustular (1)	614204	Homozygous	Autosomal recessive
	TNFAIP3	Autoinflammatory syndrome, familial, Behcet-like 1 (1)	616744	Heterozygous	Autosomal dominant
	TNFRSF1A	Periodic fever, familial, autosomal dominant (2)	142680	Heterozygous	Autosomal dominant
Inborn errors of immunity (15/61, 25%)	DOCK11	Autoinflammatory disease, multisystem, with immune dysregulation, X-linked (2)	301109	Hemizygous	X-linked
	LACC1	Juvenile arthritis (1)	618795	Homozygous	Autosomal recessive
	ELANE	Cyclic neutropenia (2)	162800	Heterozygous	Autosomal dominant
	KRAS	Ras-associated autoimmune leukoproliferative disorder (1)	614470	Heterozygous	Autosomal dominant
	NCSTN	Acne inversa, familial, 1 (1)	142690	Heterozygous	Autosomal dominant
	STXBP2	Hemophagocytic lymphohistiocytosis, familial, 5, with or without microvillus inclusion disease (1)	613101	Homozygous	Autosomal recessive
	IRAK4	Immunodeficiency 67 (1)	607676	Homozygous	Autosomal recessive
	NFKBIA	Ectodermal dysplasia and immunodeficiency 2 (1)	612132	Heterozygous	Autosomal dominant
	NFKB1	Immunodeficiency, common variable, 12 (1)	616576	Heterozygous	Autosomal dominant
	TGFB1	Camurati-Engelmann disease (1)	131300	Heterozygous	Autosomal dominant
	JAK3	Severe combined immunodeficiency, autosomal recessive, T cell-negative, B cell-positive, NK cell-negative (1)	600802	Homozygous	Autosomal recessive
	C1QA	C1q deficiency (1)	613652	Homozygous	Autosomal recessive
	C1QB	C1q deficiency (1)	613652	Homozygous	Autosomal recessive
Other monogenic conditions (12/61, 19%)	LEMD3	Buschke-Ollendorff syndrome (1)	166700	Heterozygous	Autosomal dominant
	AP1G1	Usmani-Riazuddin syndrome, autosomal dominant (1)	619467	Heterozygous	Autosomal dominant
	TBXAS1	Ghosal hematodiaphyseal dysplasia (2)	231095	Homozygous	Autosomal recessive
	PLG	Plasminogen deficiency, type 1 (1)	217090	Homozygous	Autosomal recessive
	GPNMB	Amyloidosis, primary localized cutaneous, 3 (1)	617920	Homozygous	Autosomal recessive
	PRG4	Camptodactyly-arthropathy-coxa vara-pericarditis syndrome (6)	208250	Homozygous	Autosomal recessive
IUIS-International Union of Immunological Societies
