# Supplementary material for: Exome sequencing uncovers phenotypic and genotypic heterogeneity in 198 Indian families evaluated for autoinflammatory disorders
Source: Research Square preprint supplement (doi:10.21203/rs.3.rs-7634112/v1), 2025-10-03
Supplement: Supplementary file 2 [file 7e296418bd19dd2dc964a8fc.xlsx]

## Sheet: Table 1
Table 1. Demographic details
Total number of individuals	N= 204
Gender
Males	116/204 (57%)
Females	88/204 (43%)
Total number of families	N= 198
Consanguinity
Consanguineous	37/198 (19%)
Non consanguineous	157/198 (80%)
Not available	4/198(1%)
Age distribution	N= 204
Below 1 year	6/204 (3%)
1-10 years	116/204 (57%)
11-20 years	68/204(33%)
Above 20 years	14/204 (7%)
Molecular diagnosis	61/198 (31%) families
Genetic testing	N= 198
Singleton ES	168/198 (85%) families
Duo ES	1/198 (0.5%)
Trio ES	28/198 (14%)
Quad ES	1/198 (0.5%)
Monogenic disorders identified	N= 35
Autosmal recessive	19/35 (54%)
Autosomal dominant	15/35 (43%)
X-linked	1/35 (3%)
Variants	N= 50
Pathogenic	24/50(48%)
Likely pathogenic	16 /50 (32%)
Variants of uncertain significance	10 /50 (20%)
Known	26/50 (52%)
Novel	24/ 50 (48%)
