# Supplementary material for: Exome sequencing uncovers phenotypic and genotypic heterogeneity in 198 Indian families evaluated for autoinflammatory disorders
Source: Research Square preprint supplement (doi:10.21203/rs.3.rs-7634112/v1), 2025-10-03
Supplement: Supplementary file 3 [file ded633f5c18d0bd55a944b8b.xlsx]

## Sheet: AID
Family ID	Proband ID	Status	Type of disorder	Age	Gender	Consanguinity	Provisional diagnosis	Fever	Arthritis	Urticaria	Oral ulcer	Uveitis	Cutaneous PAN	LNE	Hepatosplenomegaly	Others	Elevated inflammatory markers	Genetic testing method	Capture kit	Diagnosis achieved using	Gene	Transcript	HGVS nomenclature	Exon/Intron	Zygosity	Parental origin	Type of variant	Novel/Known	ACMG classification	Final diagnosis	OMIM	Inheritance pattern	ClinVar ID	IUIS classification
AID4	P4	Diagnosed	AID	9 years	Male	Consanguineous	SOJIA	Yes	Yes	No	No	No	No	No	No	Abdominal pain	Both ESR and CRP	Trio ES	TWIST	Trio ES	PMVK	NM_006556.4	c.398C>T p.(Ala133Val)	Exon 4	Homozygous	Maternal and paternal	Missense	Novel	VUS	PMVK-associated autoinflammatory disorder	NA	Autosomal recessive	VCV003062336.2	Defects affecting inflammasomes
AID11	P10	Diagnosed	AID	9 years	Male	Non consanguineous	Blau syndrome	Yes	Yes	No	No	Yes	No	Yes	No	Scarring alopecia	ESR	Singleton ES	TWIST	Singleton ES	NOD2	NM_001370466.1	c.919C>T p.(Arg307Trp)	Exon 4	Heterozygous	Paternal	Missense	Known	Pathogenic	Blau syndrome	186580	Autosomal dominant	VCV000004696.44	Non-inflammasome-related condition
AID13	P12	Diagnosed	AID	15 years	Male	Non consanguineous	CGD, HA20	Yes	Yes	Yes	Yes	No	No	Yes	Yes	Conjunctivits, abdominal pain, growth retardation, pallor, sparse pubic hair	ESR	Trio ES	TWIST	Trio ES	MVK	NM_000431.4	c.1094T>C p.(Phe365Ser); c.1129G>A p.(Val377Ile)	Exon 11; Exon 11	Compound heterozygous	Maternal and paternal	Missense; Missense	Known	Likely pathogenic; Pathogenic	Hyper IgD syndrome	260920	Autosomal recessive	VCV000011929.111	Defects affecting inflammasomes
AID16	P16	Diagnosed	AID	18 years	Female	Non consanguineous	FMF	Yes	Yes	No	No	No	No	No	No	Cough during fever episodes, pharyngitis, geographic tongue	Both ESR and CRP	Trio ES	TWIST	Trio ES	TNFRSF1A	NM_001065.4	c.236C>T p.(Thr79Met)	Exon 3	Heterozygous	Paternal	Missense	Known	Pathogenic	Periodic fever, familial, autosomal dominant	142680	Autosomal dominant	VCV000012336.42	Non-inflammasome-related condition
AID17	P17	Diagnosed	AID	19 years	Female	Non consanguineous	TRAPS	Yes	Yes	No	No	No	No	Yes	Yes	Tonsilitis, abdominal pain, left eye conjunctivial congestion	Both ESR and CRP	Trio ES	TWIST	Trio ES	TNFRSF1A	NM_001065.5	c.236C>T p.(Thr79Met)	Exon 4	Heterozygous	Paternal	Missense	Known	Pathogenic	Periodic fever, familial, autosomal dominant	142681	Autosomal dominant	VCV000012336.43	Non-inflammasome-related condition
AID20	P20	Diagnosed	AID	17 years	Male	Non consanguineous	Blau syndrome	No	Yes	No	No	Yes	No	No	No	Erythematous papules, synovitis	ESR	Singleton ES	TWIST	Singleton ES	NOD2	NM_001370466.1	c.919C>T p.(Arg307Trp)	Exon 4	Heterozygous	NA	Missense	Known	Pathogenic	Blau syndrome	186580	Autosomal dominant	VCV000004696.44	Non-inflammasome-related condition
AID31	P31	Diagnosed	AID	8 years	Male	Non consanguineous	Periodic fever syndrome	Yes	No	No	Yes	No	No	Yes	No	Pharyngitis, tonsilitis	Both ESR and CRP	Singleton ES	TWIST	Singleton ES	NLRP12	NM_144687.4	c.1028G>A p.(Arg343Gln)	Exon 3	Heterozygous	Paternal	Missense	Novel	VUS	NLRP12-associated autoinflammatory disease	-	Autosomal dominant	VCV002577915.1	Defects affecting inflammasomes
AID33	P33	Diagnosed	AID	11 years	Male	Consanguineous	Majeed syndrome	Yes	Yes	No	No	No	No	No	Yes	-	Both ESR and CRP	Singleton ES	TWIST	Singleton ES	LPIN2	NM_001375808.2	c.2207G>A p.(Arg736His)	Exon 17	Homozygous	Maternal and paternal	Missense	Novel	Pathogenic	Majeed syndrome	609628	Autosomal recessive	SUB15600714	Non-inflammasome-related condition
AID36	P36	Diagnosed	AID	11 years	Male	Non consanguineous	Monogenic lupus	Yes	No	No	No	No	No	No	No	Proteinuria	ESR	Singleton ES	TWIST	Singleton ES	DNASE1L3	NM_04944.4	c.643del p.(Trp215GlyfsTer2)	Exon 6	Homozygous	NA	Frameshift deletion	Known	Pathogenic	Systemic lupus erythematosus 16	614420	Autosomal recessive	VCV000030256.8	Type 1 interferonopathies
AID38	P38	Diagnosed	AID	19 years	Male	Non consanguineous	Deficiency of ADA2	Yes	No	Yes	No	No	No	No	No	Facial palsy	None	Singleton ES	TWIST	Singleton ES	ADA2	NM_001282225.2	c.139G>A p.(Gly47Arg)	Exon 2	Homozygous	Maternal and paternal	Missense	Known	Pathogenic	Vasculitis, autoinflammation, immunodeficiency, and hematologic defects syndrome	615688	Autosomal recessive	VCV000120304.66	Type 1 interferonopathies
AID42	P42	Diagnosed	AID	25 years	Male	Not available	Deficiency of ADA2	Yes	Yes	No	No	No	Yes	No	No	-		Singleton ES	TWIST	Singleton ES	ADA2	NM_001282225.2	c.142G>T p.(Gly48Trp); c.139G>A p.(Gly47Arg)	Exon 2; Exon 2	Compound heterozygous	NA	Missense	Known	Likely pathogenic; Pathogenic	Vasculitis, autoinflammation, immunodeficiency, and hematologic defects syndrome	615688	Autosomal recessive	VCV000120304.66	Type 1 interferonopathies
AID45	P46	Diagnosed	AID	11 months	Male	Non consanguineous	Juvenile arthritis	Yes	Yes	Yes	No	No	No	Yes	Yes	Pallor, rash	Both ESR and CRP	Singleton ES	TWIST	Singleton ES	MVK	NM_000431.4	c.1162C>T p.(Arg388Ter)	Exon 11	Homozygous	Maternal and paternal	Stop gain	Known	Pathogenic	Hyper IgD syndrome	260920	Autosomal recessive	VCV000097572.34	Defects affecting inflammasomes
AID47	P48	Diagnosed	AID	2 years	Male	Consanguineous	SOJIA	Yes	Yes	No	Yes	No	No	No	No	Joint contractures, frontal bossing	Both ESR and CRP	Singleton ES	TWIST	Singleton ES	MVK	NM_000431.4	c.1043T>C p.(Leu348Pro)	Exon 11	Homozygous	Maternal and paternal	Missense	Novel	VUS	Hyper IgD syndrome	260920	Autosomal recessive	SUB15600624	Defects affecting inflammasomes
AID49	P50	Diagnosed	AID	18 years	Female	Consanguineous	SOJIA	Yes	Yes	No	No	No	No	No	Yes	Hyperpigmented macules over face, short stature, joint deformity, pallor, delayed puberty	ESR	Singleton ES	TWIST	Singleton ES	SLC29A3	NM_018344.6	c.400C>T p.(Arg134Cys)	Exon 4	Homozygous	Maternal and paternal	Missense	Known	Likely pathogenic	Histiocytosis-lymphadenopathy plus syndrome	602782	Autosomal recessive	VCV001693224.5	Non-inflammasome-related condition
AID49	P51	Diagnosed	AID	16 years	Female	Consanguineous	SOJIA	No	Yes	No	No	No	No	No	Yes	-	Both ESR and CRP	Segregation by Sanger sequencing	-	Segregation by Sanger sequencing	SLC29A3	NM_018344.6	c.400C>T p.(Arg134Cys)	Exon 4	Homozygous	Maternal and paternal	Missense	Known	Likely pathogenic	Histiocytosis-lymphadenopathy plus syndrome	602782	Autosomal recessive	VCV001693224.5	Non-inflammasome-related condition
AID73	P76	Diagnosed	AID	15 months	Female	Non consanguineous	Deficiency of ADA2	Yes	No	No	No	No	No	No	No	Abdominal pain, vomiting, hemiplegia	Both ESR and CRP	Singleton ES	TWIST	Singleton ES	ADA2	NM_001282225.2	c.139G>C p.(Gly47Arg)	Exon 2	Homozygous	Maternal and paternal	Missense	Known	Pathogenic	Vasculitis, autoinflammation, immunodeficiency, and hematologic defects syndrome	615688	Autosomal recessive	VCV001076271.35	Type 1 interferonopathies
AID80	P83	Diagnosed	AID	11 years	Female	Non consanguineous	Hyper IgG syndrome	Yes	Yes	No	No	No	No	No	No	Abdominal pain	ESR	Singleton ES	TWIST	Singleton ES	MVK	NM_000431.4	c.1097A>G p.(Asp366Gly)	Exon 11	Homozygous	Maternal and paternal	Missense	Known	Likely pathogenic	Hyper IgD syndrome	260920	Autosomal recessive	SUB15600552	Defects affecting inflammasomes
AID84	P87	Diagnosed	AID	4 years	Female	Consanguineous	SLC29A3 related AID	Yes	No	No	No	No	No	Yes	No	Histiocytosis, swelling on both eyelids, cheeks	Not available	Singleton ES	TWIST	Singleton ES	SLC29A3	NM_018344.6	c.400C>T p.(Arg134Cys)	Exon 4	Homozygous	Maternal and paternal	Missense	Known	Likely pathogenic	Histiocytosis-lymphadenopathy plus syndrome	602782	Autosomal recessive	VCV001693224.5	Non-inflammasome-related condition
AID89	P92	Diagnosed	AID	5 years	Female	Non consanguineous	Majeed syndrome	Yes	Yes	No	No	No	No	No	No	Knee swelling	Both ESR and CRP	Singleton ES	TWIST	Singleton ES	LPIN2	NM_001375808.2	c.1157C>G p.(Ser386Ter)	Exon 7	Homozygous	Maternal and paternal	Stop gain	Novel	Likely pathogenic	Majeed syndrome	609628	Autosomal recessive	SUB15593120	Non-inflammasome-related condition
AID96	P99	Diagnosed	AID	15 years	Female	Non consanguineous	Cutaneous PAN	Yes	No	No	No	No	Yes	No	No	Vasculitis, erythematous rash, type I DM	None	Singleton ES	TWIST	Singleton ES	ADA2	NM_001282225.2	c.139G>C p.(Gly47Arg)	Exon 2	Homozygous	Maternal and paternal	Missense	Known	Pathogenic	Vasculitis, autoinflammation, immunodeficiency, and hematologic defects syndrome	615688	Autosomal recessive	VCV001076271.35	Type 1 interferonopathies
AID101	P104	Diagnosed	AID	17 years	Female	Non consanguineous	Deficiency of ADA2	No	No	No	No	No	Yes	No	No	Gastric, skin ulcers, abdominal pain	Not available	Singleton ES	TWIST	Singleton ES	ADA2	NM_001282225.2	c.139G>C p.(Gly47Arg)	Exon 2	Homozygous	Maternal and paternal	Missense	Known	Pathogenic	Vasculitis, autoinflammation, immunodeficiency, and hematologic defects syndrome	615688	Autosomal recessive	VCV001076271.35	Type 1 interferonopathies
AID113	P116	Diagnosed	AID	16 years	Male	Non consanguineous	Cryopyrinopathy	Yes	Yes	Yes	No	Yes	No	Yes	Yes	-	Both ESR and CRP	Singleton ES	TWIST	Singleton ES	NLRP3	NM_001243133.2	c.707A>T p.(Lys236Met)	Exon 3	Heterozygous	Maternal	Missense	Novel	VUS	NLRP3-related autoinflammatory disease	-	Autosomal dominant	SUB15593110	Defects affecting inflammasomes
AID115	P118	Diagnosed	AID	9 years	Male	Non consanguineous	Autoinflammatory disorder	Yes	Yes	No	Yes	No	No	Yes	No	Genital ulcer, abdominal pain	Both ESR and CRP	Singleton ES	TWIST	Singleton ES	TNFAIP3	NM_001270508.2	c.425G>A p.(Trp142Ter)	Exon 3	Heterozygous	Maternal	Stop gain	Novel	Likely pathogenic	Autoinflammatory syndrome, familial, Behcet-like 1	616744	Autosomal dominant	VCV002577872.1	Non-inflammasome-related condition
AID117	P119	Diagnosed	AID	17 years	Male	Consanguineous	SPENCD syndrome	Yes	Yes	No	No	No	No	No	Yes	SPENCD, lupus nephritis	Both ESR and CRP	Singleton ES	TWIST	CNV analysis using singleton ES	ACP5	NM_001611.5	~1945bp deletion at 19p13.2 (chr19: 11574954- 11576898)	Exon 3, 4, 5	Homozygous	Maternal and paternal	CNV	Known	Pathogenic	Spondyloenchondrodysplasia with immune dysregulation	607944	Autosomal recessive	SUB15601514	Type 1 interferonopathies
AID119	P121	Diagnosed	AID	11 years	Male	Non consanguineous	Deficiency of ADA2	Yes	Yes	Yes	No	No	Yes	No	No	-	Both ESR and CRP	Singleton ES	TWIST	Singleton ES	ADA2	NM_001282225.2	c.139G>A p.(Gly47Arg); c.1278dup p.(Ala427SerfsTer15)	Exon 2; Exon 9	Compound heterozygous	Maternal and paternal	Missense; Frameshift duplication	Known	Pathogenic	Vasculitis, autoinflammation, immunodeficiency, and hematologic defects syndrome	615688	Autosomal recessive	VCV001076271.35	Type 1 interferonopathies
AID119	P122	Diagnosed	AID	5 years	Female	Non consanguineous	Deficiency of ADA2	Yes	Yes	Yes	No	No	Yes	No	No	-	Both ESR and CRP	Segregation by Sanger sequencing	TWIST	Segregation by Sanger sequencing	ADA2	NM_001282225.2	c.139G>A p.(Gly47Arg); c.1278dup p.(Ala427SerfsTer15)	Exon 2; Exon 9	Compound heterozygous	Maternal and paternal	Missense; Duplication	Known	Pathogenic	Vasculitis, autoinflammation, immunodeficiency, and hematologic defects syndrome	615688	Autosomal recessive	VCV001076271.35	Type 1 interferonopathies
AID130	P133	Diagnosed	AID	1 year	Male	Non consanguineous	Periodic fever syndrome	Yes	No	No	No	No	No	Yes	Yes	-	Both ESR and CRP	Singleton ES	TWIST	Singleton ES	RIPK1	NM_001354930.2	c.970G>A p.(Asp324Asn)	Exon 8	Heterozygous	Maternal	Missense	Known	Pathogenic	Autoinflammation with episodic periodic fever and lymphadenopathy	618852	Autosomal dominant	VCV000870218.4	Defects affecting inflammasomes
AID138	P141	Diagnosed	AID	6 years	Female	Consanguineous	SLE	Yes	Yes	No	No	No	No	No	Yes	B/L Clinodactyly, clubbing of digits	None	Singleton ES	TWIST	Singleton ES	DNASE2	NM_001375.3	c.157T>C p.(Tyr53His)	Exon 2	Homozygous	Maternal and paternal	Missense	Novel	VUS	Autoinflammatory-pancytopenia syndrome	619858	Autosomal recessive	VCV002577873.1	Type 1 interferonopathies
AID146	P149	Diagnosed	AID	16 years	Male	Consanguineous	Systemic PAN	Yes	Yes	Yes	No	No	Yes	No	No	-	Both ESR and CRP	Singleton ES	TWIST	Singleton ES	ADA2	NM_001282225.2	c.139G>A p.(Gly47Arg)	Exon 2	Homozygous	Maternal and paternal	Missense	Known	Pathogenic	Vasculitis, autoinflammation, immunodeficiency, and hematologic defects syndrome	615688	Autosomal recessive	VCV000120304.66	Type 1 interferonopathies
AID165	P168	Diagnosed	AID	11 years	Male	Non consanguineous	CACP syndrome	Yes	Yes	No	No	No	No	No	No	-	Both ESR and CRP	Singleton ES	TWIST	Singleton ES	NOD2	NM_001370466.1	c.920G>A p.(Arg307Gln)	Exon 4	Heterozygous	NA	Missense	Known	Pathogenic	Blau syndrome	186580	Autosomal dominant	VCV000004694.36	Non-inflammasome-related condition
AID166	P169	Diagnosed	AID	11 years	Male	Not available	Cryopyrinopathy	Yes	Yes	Yes	No	No	No	Yes	No	-	CRP	Singleton ES	TWIST	Singleton ES	NLRP3	NM_001243133.2	c.977G>A p.(Gly326Glu)	Exon 4	Heterozygous	De novo	Missense	Known	Pathogenic	NLRP3-associated autoinflammatory disease	-	Autosomal dominant	VCV000097992.7	Defects affecting inflammasomes
AID184	P186	Diagnosed	AID	4 years	Male	Not available	Early onset sarcoidosis	Yes	Yes	No	Yes	Yes	No	No	No	-	ESR	Singleton ES	TWIST	Singleton ES	NOD2	NM_001370466.1	c.919C>T p.(Arg307Trp)	Exon 4	Heterozygous	NA	Missense	Known	Pathogenic	Blau syndrome	186580	Autosomal dominant	VCV000004696.44	Non-inflammasome-related condition
AID191	P193	Diagnosed	AID	4 years	Female	Non consanguineous	Blau syndrome	Yes	Yes	Yes	Yes	Yes	No	Yes	No	Joint deformity	CRP	Singleton ES	TWIST	Singleton ES	NOD2	NM_001370466.1	c.919C>T p.(Arg307Trp)	Exon 4	Heterozygous	De novo	Missense	Known	Pathogenic	Blau syndrome	186580	Autosomal dominant	VCV000004696.44	Non-inflammasome-related condition
AID199	P199	Diagnosed	AID	11 years	Female	Consanguineous	Deficiency of ADA2	Yes	Yes	No	No	No	No	No	Yes	-	Both ESR and CRP	Singleton ES	TWIST	Singleton ES	IL1RN	NM_173842.3	c.45del p.(Leu16SerfsTer35)	Exon 1	Homozygous	Maternal and paternal	Frameshift deletion	Novel	Likely pathogenic	Chronic recurrent multifocal osteomyelitis 2, with periostitis and pustulosis	612852	Autosomal recessive	VCV003069200.2	Non-inflammasome-related condition
CRC650	P201	Diagnosed	AID	13 years	Female	Non consanguineous	Deficiency of ADA2	Yes	Yes	No	No	No	Yes	No	No	-	Both ESR and CRP	Singleton ES	TWIST	Singleton ES	ADA2	NM_001282225.2	c.139G>A p.(Gly47Arg)	Exon 2	Homozygous	Maternal and paternal	Missense	Known	Pathogenic	Vasculitis, autoinflammation, immunodeficiency, and hematologic defects syndrome	615688	Autosomal recessive	VCV000120304.66	Type 1 interferonopathies
CRC796	P206	Diagnosed	AID	12 years	Male	Non consanguineous	Pustular psoriasis	Yes	No	Yes	No	No	No	No	No	Psoriasis	None	Singleton ES	TWIST	Singleton ES	IL36RN	NM_012275.3	c.204_211del p.(Ser69GlyfsTer55)	Exon 4	Homozygous	Maternal and paternal	Frameshift deletion	Novel	Pathogenic	Psoriasis 14, pustular,	614204	Autosomal recessive	SUB15200760	Non-inflammasome-related condition

## Sheet: Other IEI
Family ID	Proband ID	Status	Type of disorder	Age	Gender	Consanguinity	Provisional diagnosis	Fever	Arthritis	Urticaria	Oral ulcer	Uveitis	Cutaneous PAN	LNE	Hepatosplenomegaly	Others	Elevated inflammatory markers	Genetic testing method	Capture kit	Diagnosis achieved using	Gene	Transcript	HGVS nomenclature	Exon/Intron	Zygosity	Parental origin	Type of variant	Novel/Known	ACMG classification	Final diagnosis	OMIM	Inheritance pattern	ClinVar ID	IUIS Classification (Sub type)
AID55	P58	Diagnosed	IEI	2 years	Male	Consanguineous	Juvenile arthritis	Yes	Yes	No	No	No	No	No	No	ROM in hands and legs	ESR	Trio ES	TWIST	Trio ES	LACC1	NM_153218.4	c.781_795del p.(Glu261_Tyr265del)	Exon 4	Homozygous	Maternal and paternal	Frameshift deletion	Novel	Likely pathogenic	Juvenile arthritis	618795	Autosomal recessive	VCV001686635.3	Diseases of immune dysregulation (Syndromes with autoimmunity and no regulatory T cell defect)
AID66	P69	Diagnosed	IEI	2 years	Male	Non consanguineous	Periodic fever syndrome	Yes	No	No	Yes	No	No	No	No	-		Singleton ES	TWIST	Singleton ES	ELANE	NM_001972.4	g.855795G>A	Intron 4	Heterozygous	De novo	Splicing	Known	Pathogenic	Cyclic neutropenia	162800	Autosomal dominant	VCV000242287.27	Congenital defects of phagocyte number, function, or both (Neutropenia without associated syndrome)
AID69	P72	Diagnosed	IEI	12 years	Male	Non consanguineous	Autoinflammatory disorder	No	No	No	Yes	No	No	No	No	Breathlessness, back pain	Not available	Trio ES	TWIST	Trio ES	TGFB1	NM_000660.7	c.652C>T p.(Arg218Cys)	Exon 4	Heterozygous	De novo	Missense	Known	Pathogenic	Camurati-Engelmann disease	131300	Autosomal dominant	VCV000012531.33	Diseases of immune dysregulation (Immune dysregulation with colitis)
AID75	P78	Diagnosed	IEI	10 years	Male	Consanguineous	Interferonopathy	No	No	Yes	Yes	No	No	No	Yes	Joint pain, abdominal pain, vomiting, chronic pancreatitis, hyperpigmentation	CRP	Singleton ES	TWIST	Singleton ES	C1QB	NM_001378156.1	c.174del p.(Glu59ArgfsTer85)	Exon 2	Homozygous	Maternal and paternal	Frameshift deletion	Known	Pathogenic	C1Q deficiency	613652	Autosomal recessive	VCV000097572.34	Complement deficiencies (Non-infectious phenotype)
AID83	P86	Diagnosed	IEI	4 years	Male	Non consanguineous	ALPS	No	No	No	No	No	No	No	Yes	-	CRP	Singleton ES	TWIST	Singleton ES	KRAS	NM_004985.5	c.436G>C p.(Ala146Pro)	Exon 4	Heterozygous	De novo	Missense	Known	Pathogenic	Ras-associated autoimmune leukoproliferative disorder	614470	Autosomal dominant	VCV000375963.12	Diseases of immune dysregulation (Syndromes with autoimmunity and lymphoproliferation)
AID102	P105	Diagnosed	IEI	33 years	Female	Non consanguineous	PAPASH syndrome	Yes	No	Yes	No	No	No	No	No	Multiple hyperpigmented plaques over face, lower limbs	Both ESR and CRP	Singleton ES	TWIST	Singleton ES	NCSTN	NM_015331.3	c.579del p.(Lys193AspfsTer9)	Exon 5	Heterozygous	NA	Frameshift deletion	Novel	Likely pathogenic	Acne inversa, familial, 1	142690	Autosomal dominant	SUB15594064	Defects in intrinsic and innate immunity (Others)
AID124	P128	Diagnosed	IEI	25 years	Male	Non consanguineous	Autoinflammatory disorder	Yes	No	No	Yes	No	No	No	Yes	Kyphoscoliosis,adenitis	None	Singleton ES	TWIST	Singleton ES	ELANE	NM_001972.4	c.377C>T p.(Ser126Leu)	Exon 4	Heterozygous	De novo	Missense	Known	Pathogenic	Cyclic neutropenia	162800	Autosomal dominant	VCV000016745.23	Congenital defects of phagocyte number, function, or both (Neutropenia without associated syndrome)
AID132	P135	Diagnosed	IEI	21 years	Female	Consanguineous	ALPS	Yes	No	No	No	No	No	Yes	Yes	Abdominal pain	Both ESR and CRP	Singleton ES	TWIST	Singleton ES	STXBP2	NM_006949.4	c.58C>T p.(Arg20Trp)	Exon 2	Homozygous	Maternal and paternal	Missense	Novel	VUS	Hemophagocytic lymphohistiocytosis, familial, 5, with or without microvillus inclusion disease	613101	Autosomal recessive	VCV002577877.2	Diseases of immune dysregulation (Familial Hemophagocytic Lymphohistiocytosis without hypopigmentation)
AID135	P138	Diagnosed	IEI	11 years	Male	Consanguineous	Autoinflammatory disorder	Yes	Yes	No	No	No	No	No	Yes	Immunodeficiency	Both ESR and CRP	Singleton ES	TWIST	Singleton ES	IRAK4	NM_016123.4	c.169G>A p.(Glu57Lys)	Exon 3	Homozygous	Maternal and paternal	Missense	Novel	VUS	Immunodeficiency 67	607676	Autosomal recessive	VCV002577878.1	Defects in intrinsic and innate immunity (Predisposition to bacterial functions)
AID151	P154	Diagnosed	IEI	1 year 9 months	Female	Consanguineous	Primary immunodeficiency	Yes	Yes	No	No	No	No	No	No	Primary immunodeficiency	Both ESR and CRP	Singleton ES	TWIST	Singleton ES	NFKB1	NM_003998.4	c.2583C>A p.(Asp861Glu)	Exon 22	Heterozygous	Maternal	Missense	Novel	VUS	Immunodeficiency, common variable, 12	616576	Autosomal dominant	SUB15601023	Predominantly antibody deficiencies, Hypogammaglobulinemias (Common variable immunodeficiency phenotype)
AID153	P156	Diagnosed	IEI	2 years	Female	Non consanguineous	Early onset IBD	Yes	No	Yes	No	No	No	No	No	Abdominal pain	Both ESR and CRP	Singleton ES	TWIST	Singleton ES	NFKBIA	NM_020529.3	c.28G>T p.(Glu10Ter)	Exon 1	Heterozygous	De novo	Stop gain	Novel	Pathogenic	Ectodermal dysplasia and immunodeficiency 2	612132	Autosomal recessive	VCV002577914.1	Combined immunodeficiency with associated or syndromic features (Anhidrotic ectodermal dysplasia with ID)
AID163	P166	Diagnosed	IEI	3 months	Male	Non consanguineous	Immunodeficiency disorder	Yes	No	No	No	No	No	No	Yes	-	Both ESR and CRP	Singleton ES	TWIST	Singleton ES	JAK3	NM_000215.4	c.1048C>T p.(Arg350Trp)	Exon 8	Homozygous	Maternal and paternal	Missense	Known	Likely pathogenic	Severe combined immunodeficiency, autosomal recessive, T cell-negative, B cell-positive, NK cell-negative	600802	Autosomal recessive	SUB15593132	Immunodeficiencies affecting cellular and humoral immunity (CD19 Normal: SCID T- B+ NK-)
AID172	P175	Diagnosed	IEI	5 years	Male	Consanguineous	SLE	Yes	No	Yes	No	No	No	No	No	-	Both ESR and CRP	Singleton ES	TWIST	Singleton ES	C1QA	NM_015991.4	c.622C>T p.(Gln208Ter)	Exon 3	Homozygous	Maternal and paternal	Stop gain	Known	Pathogenic	C1q deficiency	613652	Autosomal recessive	VCV000017073.6	Complement deficiencies (Non-infectious phenotype)
AID192	P194	Diagnosed	IEI	3 years	Male	Non consanguineous	PAPA syndrome	Yes	Yes	Yes	No	No	No	No	Yes	-	Both ESR and CRP	Singleton ES	TWIST	Singleton ES	DOCK11	NM_144658.4	c.2696T>C p.(Ile899Thr)	Exon 25	Hemizygous	Maternal	Missense	Novel	VUS	Autoinflammatory disease, multisystem, with immune dysregulation, X-linked	301109	X-linked recessive	SUB15601293	Diseases of immune dysregulation (Immune dysregulation with colitis)
CRC546	P200	Diagnosed	IEI	13 years	Male	Consanguineous	Recurrent fever	Yes	Yes	Yes	No	No	No	No	Yes	-	Both ESR and CRP	Singleton ES	TWIST	Singleton ES	DOCK11	NM_144658.4	c.2185C>G p.(Lys729Val)	Exon 20	Hemizygous	Maternal	Missense	Novel	VUS	Autoinflammatory disease, multisystem, with immune dysregulation, X-linked	301109	X-linked recessive	SUB15601444	Diseases of immune dysregulation (Immune dysregulation with colitis)

## Sheet: Non-AID 
Family ID	Proband ID	Status	Type of disorder	Age	Gender	Consanguinity	Provisional diagnosis	Fever	Arthritis	Urticaria	Oral ulcer	Uveitis	Cutaneous PAN	LNE	Hepatosplenomegaly	Others	Elevated inflammatory markers	Genetic testing method	Capture kit	Diagnosis achieved using	Gene	Transcript	HGVS nomenclature	Exon/Intron	Zygosity	Parental origin	Type of variant	Novel/Known	ACMG classification	Final diagnosis	OMIM	Inheritance pattern	ClinVar ID
AID9	P8	Diagnosed	Non-AID	4 years	Male	Non consanguineous	Autoinflammatory disorder	Yes	No	No	No	No	No	No	Yes	Tonsilitis, bone swelling	Both ESR and CRP	Trio ES	TWIST	Trio ES	LEMD3	NM_014319.5	c.1994A>G p.(Gln665Arg)	Exon 7	Heterozygous	De novo	Missense	Novel	Likely pathogenic	Buschke-Ollendorff syndrome	166700	Autosomal dominant	VCV001686636.3
AID15	P15	Diagnosed	Non-AID	10 months	Female	Non consanguineous	Periodic fever syndrome	Yes	No	Yes	No	No	No	No	No	Pallor, joint swelling, abnormal movements	ESR	Trio ES	TWIST	Trio ES	AP1G1	NM_001128.6	c.43C>T p.(Arg15Trp)	Exon 2	Heterozygous	De novo	Missense	Novel	Likely pathogenic	Usmani-Riazuddin syndrome, autosomal dominant	619467	Autosomal dominant	SUB15594047
AID44	P45	Diagnosed	Non-AID	1 year	Male	Non consanguineous	Recurrent fever	Yes	No	Yes	No	No	No	No	Yes	Rash	CRP	Singleton ES	TWIST	Singleton ES	TBXAS1	NM_001061.7	c.1235G>A p.(Arg412Gln)	Exon 11	Homozygous	Maternal and paternal	Missense	Known	Likely pathogenic	Ghosal hematodiaphyseal dysplasia	231095	Autosomal recessive	VCV000011889.38
AID53	P55	Diagnosed	Non-AID	6 years	Female	Consanguineous	CACP syndrome	No	Yes	No	No	No	No	No	No	Overriding digits, tenosynovitis	None	Singleton ES	TWIST	Singleton ES	PRG4	NM_005807.6	c.962T>A p.(Lys321Ter)	Exon 7	Homozygous	Maternal and paternal	Stop gain	Novel	Likely pathogenic	Camptodactyly-arthropathy-coxa vara-pericarditis syndrome	208250	Autosomal recessive	VCV001695913.3
AID53	P56	Diagnosed	Non-AID	1 year	Male	Consanguineous	CACP syndrome	Yes	Yes	No	No	No	No	No	No	-		Segregation by Sanger sequencing	TWIST	Segregation by Sanger sequencing	PRG4	NM_005807.6	c.962T>A p.(Lys321Ter)	Exon 7	Homozygous	Maternal and paternal	Stop gain	Novel	Likely pathogenic	Camptodactyly-arthropathy-coxa vara-pericarditis syndrome	208250	Autosomal recessive	VCV001695913.3
AID65	P68	Diagnosed	Non-AID	18 years	Female	Consanguineous	Polyarticular JIA	Yes	Yes	No	No	No	No	No	No	Joint deformity	ESR	Singleton ES	TWIST	Singleton ES	PRG4	NM_005807.6	c.2816_2817del p.(Lys939ArgfsTer38)	Exon 7	Homozygous	NA	Frameshift deletion	Known	Likely pathogenic	Camptodactyly-arthropathy-coxa vara-pericarditis syndrome	208250	Autosomal recessive	VCV002577874.1
AID74	P77	Diagnosed	Non-AID	10 years	Male	Consanguineous	Autoinflammatory disorder	Yes	Yes	Yes	Yes	No	No	Yes	No	Scars over limb, right upper limb paralysis associate with facial deviation	ESR	Singleton ES	TWIST	Singleton ES	PLG	NM_000301.5	c.112A>G p.(Lys38Glu)	Exon 2	Homozygous	Maternal and paternal	Missense	Known	Likely pathogenic	Plasminogen deficiency, type 1	217090	Autosomal recessive	VCV000013583.35
AID76	P79	Diagnosed	Non-AID	12 years	Female	Non consanguineous	Blau syndrome	No	Yes	No	No	No	No	No	No	Synovitis	None	Singleton ES	TWIST	Singleton ES	PRG4	NM_005807.6	c.2816_2817del p.(Lys939ArgfsTer38)	Exon 7	Homozygous	NA	Frameshift deletion	Known	Likely pathogenic	Camptodactyly-arthropathy-coxa vara-pericarditis syndrome	208250	Autosomal recessive	VCV002577874.1
AID77	P80	Diagnosed	Non-AID	10 years	Female	Consanguineous	Blau syndrome	Yes	No	Yes	No	Yes	No	No	No	-	None	Singleton ES	TWIST	Singleton ES	GPNMB	NM_002510.3	g.23267884A>G	Intron 7	Homozygous	Maternal and paternal	Splicing	Novel	Pathogenic	Amyloidosis, primary localized cutaneous, 3	617920	Autosomal recessive	VCV002577912.1
AID121	P124	Diagnosed	Non-AID	6 years	Male	Consanguineous	Autoinflammatory disorder	Yes	Yes	No	No	No	No	No	No	Camptodactyly in B/L fingers and toes	None	Singleton ES	TWIST	Singleton ES	PRG4	NM_005807.6	c.1910_1911del p.(Pro637ArgfsTer9)	Exon 7	Homozygous	NA	Frameshift deletion	Known	Pathogenic	Camptodactyly-arthropathy-coxa vara-pericarditis syndrome	208250	Autosomal recessive	VCV000684670.4
AID122	P125	Diagnosed	Non-AID	24 years	Female	Consanguineous	CACP syndrome	Yes	Yes	No	No	No	No	No	No	Camptodactyly in B/L fingers and toes	None	Singleton ES	TWIST	Singleton ES	PRG4	NM_005807.6	c.1134dup p.(Lys379GlnfsTer260)	Exon 7	Homozygous	Maternal and paternal	Duplication	Novel	Pathogenic	Camptodactyly-arthropathy-coxa vara-pericarditis syndrome	208250	Autosomal recessive	VCV002577870.1
AID122	P126	Diagnosed	Non-AID	23 years	Female	Consanguineous	CACP syndrome	Yes	Yes	No	No	No	No	No	No	Camptodactyly in B/L fingers and toes	None	Segregation by Sanger sequencing	TWIST	Segregation by Sanger sequencing	PRG4	NM_005807.6	c.1134dup p.(Lys379GlnfsTer260)	Exon 7	Homozygous	Maternal and paternal	Duplication	Novel	Pathogenic	Camptodactyly-arthropathy-coxa vara-pericarditis syndrome	208250	Autosomal recessive	VCV002577870.1
AID123	P127	Diagnosed	Non-AID	14 years	Male	Non consanguineous	Behcet's disease	Yes	Yes	Yes	No	No	No	No	No	-	Both ESR and CRP	Singleton ES	TWIST	Singleton ES	TBXAS1	NM_001061.7	c.1235G>A p.(Arg412Gln)	Exon 11	Homozygous	Maternal and paternal	Missense	Known	Likely pathogenic	Ghosal hematodiaphyseal dysplasia	231095	Autosomal recessive	VCV000011889.38
AID195	P197	Diagnosed	Non-AID	3 years	Male	Consanguineous	CACP syndrome	Yes	Yes	No	No	No	No	No	No	Camptodactyly in B/L fingers and toes	None	Singleton ES	TWIST	Singleton ES	PRG4	NM_005807.6	c.1699del p.(Glu567SerfsTer345)	Exon 7	Homozygous	Maternal and paternal	Frameshift deletion	Novel	Pathogenic	Camptodactyly-arthropathy-coxa vara-pericarditis syndrome	208250	Autosomal recessive	VCV002577871.1

## Sheet: Undiagnosed
Family ID	Proband ID	Status	Age	Gender	Consanguinity	Provisional diagnosis	Fever	Arthritis	Urticaria	Oral ulcer	Uveitis	Cutaneous PAN	LNE	Hepatosplenomegaly	Others	Elevated inflammatory markers	Genetic testing method	Capture kit
AID1	P1	Undiagnosed	1 year	Male	Non-consanguineous	SOJIA	Yes	Yes	Yes	No	No	No	No	No	-	CRP	Singleton ES	TWIST
AID2	P2	Undiagnosed	12 years	Male	Non consanguineous	Blau syndrome	Yes	Yes	Yes	Yes	Yes	No	Yes	Yes	-	Both ESR and CRP	Singleton ES	TWIST
AID3	P3	Undiagnosed	11 years	Male	Non consanguineous	SOJIA	Yes	Yes	Yes	Yes	Yes	No	No	No	NonNospecific chest pain, pharyngitis, cataract	Both ESR and CRP	Trio ES	TWIST
AID5	P5	Undiagnosed	14 years	Female	Non consanguineous	CANDLE syndrome	No	Yes	Yes	Yes	No	No	No	No	Acanthosis, acne, myalgia	None	Singleton ES	TWIST
AID7	P6	Undiagnosed	13 years	Female	Non consanguineous	Autoinflammatory disorder	Yes	Yes	No	Yes	No	No	No	No	Lymphadenitis, idiopathic generalised epilepsy, dry skin	None	Trio ES	TWIST
AID8	P7	Undiagnosed	20 years	Female	Non consanguineous	Autoinflammatory disorder	Yes	Yes	No	Yes	No	No	Yes	No	Delayed menarche, chest pain, hypoadrenalism, persistent vomiting, delay in gross motor development, sparse body hair	Both ESR and CRP	Trio ES	TWIST
AID10	P9	Undiagnosed	7 years	Female	Non consanguineous	Behcet's disease	Yes	No	No	Yes	No	No	Yes	No	Genital ulcer, abdominal pain	None	Singleton ES	TWIST
AID12	P11	Undiagnosed	17 years	Male	Consanguineous	Uveitis, SNHL	No	No	No	No	Yes	No	No	No	SNHL, chronic recurrent pancreatitis	ESR	Trio ES	TWIST
AID14	P13	Undiagnosed	6 years	Female	Non consanguineous	Oligoarticular JIA	No	Yes	No	No	Yes	No	No	No	Parotitis, wide nasal bridge	Both ESR and CRP	Quad ES	TWIST
AID14	P14	Undiagnosed	11 years	Female	Non consanguineous	Oligoarticular JIA	Yes	Yes	Yes	No	No	No	No	No	Tonsilitis, Joint swelling and tenderness, parotitis	Both ESR and CRP	Quad ES	TWIST
AID18	P18	Undiagnosed	1 year	Male	Not available	Autoinflammatory disorder	Yes	No	Yes	No	Yes	No	No	No	Broad forehead, flat nasal bridge, short neck	Both ESR and CRP	Trio ES	TWIST
AID19	P19	Undiagnosed	13 years	Male	Non consanguineous	Majeed syndrome	Yes	Yes	No	No	No	No	No	Yes	Visual impairment in left eye, pectus carinatum	Both ESR and CRP	Trio ES	TWIST
AID21	P21	Undiagnosed	15 years	Female	Non consanguineous	Behcet's disease	No	Yes	No	Yes	No	No	No	No	Genital ulcer, joint pain, skin lesions over armpit	Both ESR and CRP	Trio ES	TWIST
AID22	P22	Undiagnosed	14 years	Female	Non consanguineous	Periodic fever syndrome	Yes	No	No	No	No	No	No	No	Pharyngitis, myalgia	CRP	Singleton ES	TWIST
AID23	P23	Undiagnosed	11 years	Male	Non consanguineous	Blau syndrome	Yes	Yes	No	No	Yes	No	No	No	-	Both ESR and CRP	Singleton ES	TWIST
AID24	P24	Undiagnosed	5 years	Female	Non consanguineous	Autoinflammatory disorder	No	No	Yes	No	No	No	No	Yes	ColdNoinduced urticarial rash, sparse hair	None	Singleton ES	TWIST
AID25	P25	Undiagnosed	5 years	Male	Non consanguineous	Polyarticular JIA	No	Yes	No	No	Yes	No	Yes	No	Alopecia, abdominal pain, nail pitting	None	Singleton ES	TWIST
AID26	P26	Undiagnosed	2 years	Female	Non consanguineous	TRAPS	Yes	Yes	No	No	No	No	No	Yes	Recurrent MAS, recurrent skin rashes	None	Singleton ES	TWIST
AID27	P27	Undiagnosed	20 years	Female	Non consanguineous	Autoinflammatory disorder	No	No	No	No	No	No	No	No	Breathing difficulty, neck swelling	None	Singleton ES	TWIST
AID28	P28	Undiagnosed	10 years	Male	Consanguineous	Blau syndrome	Yes	No	No	No	Yes	No	Yes	Yes	Interstitial nephritis, photophobia	Both ESR and CRP	Trio ES	TWIST
AID29	P29	Undiagnosed	8 years	Female	Non consanguineous	Blau syndrome	Yes	Yes	Yes	No	No	No	Yes	No	Joint swelling, thyromegaly	CRP	Singleton ES	TWIST
AID30	P30	Undiagnosed	2 years	Male	Non consanguineous	Periodic fever syndrome	No	Yes	No	No	Yes	No	No	No	-	Both ESR and CRP	Trio ES	TWIST
AID32	P32	Undiagnosed	15 years	Female	Non consanguineous	COGAN syndrome	Yes	No	No	No	Yes	No	No	No	Sudden onset of right side SNHL	ESR	Trio ES	TWIST
AID34	P34	Undiagnosed	14 years	Male	Non consanguineous	TRAPS	Yes	No	No	No	No	No	No	No	Seizures during fever spike	None	Singleton ES	TWIST
AID35	P35	Undiagnosed	4 years	Male	Non consanguineous	Autoinflammatory disorder	Yes	Yes	Yes	Yes	No	No	No	No	-	None	Singleton ES	TWIST
AID37	P37	Undiagnosed	5 years	Male	Non consanguineous	Monogenic SLE	Yes	Yes	No	Yes	No	No	Yes	No	Joint tenderness, synovitis, class IIIA lupus nephritis	Both ESR and CRP	Trio ES	TWIST
AID39	P39	Undiagnosed	5 years	Female	Non consanguineous	SOJIA	Yes	Yes	Yes	No	No	No	Yes	No	Seizures, maculopapular rash	Both ESR and CRP	Singleton ES	TWIST
AID40	P40	Undiagnosed	11 years	Female	Non consanguineous	PFAPA	Yes	No	No	No	No	No	Yes	Yes	Hematuria, proteinuria	CRP	Singleton ES	TWIST
AID41	P41	Undiagnosed	5 years	Male	Non consanguineous	Periodic fever syndrome	Yes	No	No	No	No	No	Yes	No	-	Both ESR and CRP	Singleton ES	TWIST
AID43	P43	Undiagnosed	8 years	Male	Consanguineous	Autoinflammatory disorder	Yes	No	No	Yes	No	No	No	No	Microhematuria, pharyngitis, tonsilitis	Both ESR and CRP	Singleton ES	TWIST
AID43	P44	Undiagnosed	12 years	Male	Consanguineous	Autoinflammatory disorder	Yes	No	No	Yes	No	No	No	No	Microhematuria, pharyngitis, tonsilitis	Both ESR and CRP	Singleton ES	TWIST
AID46	P47	Undiagnosed	8 years	Male	Non consanguineous	SOJIA	Yes	No	Yes	No	No	No	No	No	Joint pain	Both ESR and CRP	Singleton ES	TWIST
AID48	P49	Undiagnosed	3 years	Male	Non consanguineous	Autoinflammatory disorder	Yes	No	Yes	No	No	No	No	No	-	CRP	Singleton ES	TWIST
AID50	P52	Undiagnosed	11 years	Male	Non consanguineous	Cold urticaria	Yes	No	Yes	No	No	No	No	No	Cold urticaria	None	Singleton ES	TWIST
AID51	P53	Undiagnosed	3 years	Female	Non consanguineous	Monogenic lupus	No	Yes	Yes	Yes	No	No	No	Yes	Photosensitivity, edema, depressed nasal bridge	None	Singleton ES	TWIST
AID52	P54	Undiagnosed	6 years	Male	Non consanguineous	Chronic recurrent multifocal osteomyelitis	No	No	No	No	No	No	No	No	Osteomyelitis, antalgic gait	None	Singleton ES	TWIST
AID54	P57	Undiagnosed	6 years	Male	Non consanguineous	Periodic fever syndrome	Yes	No	No	Yes	No	No	Yes	Yes	Abdominal pain	Both ESR and CRP	Singleton ES	TWIST
AID56	P59	Undiagnosed	10 years	Male	Non consanguineous	Behcet's disease	No	Yes	No	No	No	No	No	No	Abdominal pain	CRP	Singleton ES	TWIST
AID57	P60	Undiagnosed	15 years	Male	Consanguineous	Autoinflammatory disorder	Yes	Yes	No	No	No	No	No	No	Joint deformity, ligament laxity	None	Singleton ES	TWIST
AID58	P61	Undiagnosed	14 years	Female	Non consanguineous	Autoinflammatory disorder	No	Yes	Yes	No	No	No	No	No	-	None	Singleton ES	TWIST
AID59	P62	Undiagnosed	6 years	Female	Non consanguineous	Autoinflammatory disorder	Yes	Yes	No	No	No	No	No	No	Abdominal pain, joint tenderness	None	Singleton ES	TWIST
AID60	P63	Undiagnosed	20 years	Male	Non consanguineous	Behcet's disease	Yes	Yes	Yes	Yes	Yes	No	No	No	Genital ulcer, hematochezia, diarrhoea	Both ESR and CRP	Singleton ES	TWIST
AID61	P64	Undiagnosed	11 years	Male	Non consanguineous	Periodic fever syndrome	No	No	No	No	No	No	Yes	No	Milliary rash, arthralgia	None	Singleton ES	TWIST
AID62	P65	Undiagnosed	14 years	Female	Non consanguineous	Autoinflammatory disorder	Yes	No	Yes	No	Yes	No	Yes	No	Cataract, short stature, G6PD defeciency, pericarditis, GDD, digital clubbing	None	Singleton ES	TWIST
AID63	P66	Undiagnosed	2 years	Male	Non consanguineous	Periodic fever syndrome	Yes	No	No	No	No	No	No	No	Pharyngitis, diarrhoea, speech delay	CRP	Singleton ES	TWIST
AID64	P67	Undiagnosed	10 years	Female	Non consanguineous	Blau syndrome	Yes	Yes	Yes	No	No	No	No	No	Recurrent MAS, recurrent skin rashes, ROM neck	Both ESR and CRP	Singleton ES	TWIST
AID67	P70	Undiagnosed	67 years	Male	Non consanguineous	FMF	Yes	No	Yes	No	No	No	No	No	Lower limb edema, pleural effusion, pericardial effusion	Both ESR and CRP	Singleton ES	TWIST
AID68	P71	Undiagnosed	3 years	Male	Non consanguineous	Behcet's disease	Yes	No	No	Yes	No	No	No	No	Conjunctivitis, joint deformity, abdominal pain	None	Singleton ES	TWIST
AID70	P73	Undiagnosed	5 years	Male	Non consanguineous	Blau syndrome	Yes	No	No	No	Yes	No	No	No	Dense cataract	None	Singleton ES	TWIST
AID71	P74	Undiagnosed	15 years	Female	Non consanguineous	COPA syndrome	Yes	No	No	No	No	No	No	No	Respiratory infections, chronic cough, vomiting	None	Singleton ES	TWIST
AID72	P75	Undiagnosed	1 year	Male	Non consanguineous	Periodic fever syndrome	Yes	No	No	No	No	No	No	No	Pharyngitis, tonsilitis, rhinorrhea, delay in speech development	Both ESR and CRP	Singleton ES	TWIST
AID78	P81	Undiagnosed	8 months	Female	Non consanguineous	Deficiency of ADA2	Yes	No	Yes	No	No	No	No	Yes	Coronary dilation	Both ESR and CRP	Singleton ES	TWIST
AID79	P82	Undiagnosed	2 years	Female	Non consanguineous	TRAPS	Yes	No	Yes	No	No	No	No	No	Abdominal pain, rash	Both ESR and CRP	Singleton ES	TWIST
AID81	P84	Undiagnosed	1 year	Male	Non consanguineous	CINCA syndrome	Yes	Yes	Yes	No	No	No	Yes	No	Macrocephaly, depressed nasal bridge, joint swelling	Both ESR and CRP	Singleton ES	TWIST
AID82	P85	Undiagnosed	3 years	Male	Non consanguineous	Anemia, Hepatosplenomegaly, hypereosinophilia with CKD	Yes	No	No	No	No	No	No	Yes	Chronic renal failure	Both ESR and CRP	Singleton ES	TWIST
AID85	P88	Undiagnosed	3 years	Female	Non consanguineous	Periodic fever syndrome	Yes	No	No	Yes	No	No	No	No	-	Both ESR and CRP	Singleton ES	TWIST
AID86	P89	Undiagnosed	12 years	Female	Not available	Cutaneous PAN	Yes	Yes	Yes	Yes	No	Yes	No	No	Pharyngitis, abdominal pain	Both ESR and CRP	Singleton ES	TWIST
AID87	P90	Undiagnosed	3 years	Female	Non consanguineous	Periodic fever syndrome	Yes	No	No	No	No	No	Yes	No	Abdominal pain	CRP	Singleton ES	TWIST
AID88	P91	Undiagnosed	12 years	Male	Non consanguineous	Systemic PAN	Yes	Yes	Yes	Yes	No	Yes	No	Yes	Hyperpigmented nodules, periorbital puffiness, joint pain/stiffness	Both ESR and CRP	Singleton ES	TWIST
AID90	P93	Undiagnosed	9 years	Male	Non consanguineous	Autoinflammatory disorder	Yes	No	No	No	No	No	No	No	Alopecia areata	Both ESR and CRP	Singleton ES	TWIST
AID91	P94	Undiagnosed	5 years	Male	Non consanguineous	Behcet's disease	Yes	No	No	No	No	No	No	No	Vasculitic skin rash, hematochezia, abdominal pain	None	Singleton ES	TWIST
AID92	P95	Undiagnosed	14 years	Male	Non consanguineous	Inflammatory bowel disease	Yes	No	No	No	No	No	Yes	No	-	None	Singleton ES	TWIST
AID93	P96	Undiagnosed	1 year	Male	Non consanguineous	Inflammatory bowel disease	Yes	No	No	Yes	No	No	No	No	Abdominal pain, diarrhoea, vomiting	CRP	Singleton ES	TWIST
AID94	P97	Undiagnosed	10 years	Female	Non consanguineous	Behcet's disease	Yes	Yes	No	No	No	No	No	No	Maculopapular rash	None	Singleton ES	TWIST
AID95	P98	Undiagnosed	7 years	Male	Non consanguineous	Autoinflammatory disorder	Yes	Yes	Yes	Yes	No	No	No	No	Dry skin	Both ESR and CRP	Singleton ES	TWIST
AID97	P100	Undiagnosed	1 year 6 months	Female	Non consanguineous	Periodic fever syndrome	Yes	No	No	No	No	No	No	No	Dry cough, rhinorrhea	ESR	Singleton ES	TWIST
AID98	P101	Undiagnosed	4 years	Female	Non consanguineous	Autoinflammatory disorder	Yes	No	No	No	No	No	No	No	-	CRP	Trio ES	TWIST
AID99	P102	Undiagnosed	5 years	Male	Non consanguineous	Autoinflammatory disorder	No	No	No	No	No	No	No	No	Papular lesions	None	Singleton ES	TWIST
AID100	P103	Undiagnosed	15 years	Female	Consanguineous	Autoinflammatory disorder	Yes	No	No	No	No	No	No	Yes	Recurrent parotitis, short stature	Both ESR and CRP	Singleton ES	TWIST
AID103	P106	Undiagnosed	7 years	Male	Non consanguineous	SOJIA	Yes	Yes	Yes	No	No	No	No	No	-	Both ESR and CRP	Singleton ES	TWIST
AID104	P107	Undiagnosed	14 years	Female	Non consanguineous	Systemic PAN	Yes	No	Yes	Yes	No	Yes	No	No	-	Both ESR and CRP	Singleton ES	TWIST
AID105	P108	Undiagnosed	2 years 7 months	Male	Consanguineous	Urticarial vasculitis	Yes	No	Yes	Yes	No	No	No	No	-	ESR	Singleton ES	TWIST
AID106	P109	Undiagnosed	15 years	Female	Non consanguineous	Periodic fever syndrome	Yes	No	Yes	Yes	No	No	No	No	-	None	Singleton ES	TWIST
AID107	P110	Undiagnosed	12 years	Male	Non consanguineous	Blau syndrome	Yes	Yes	No	No	Yes	No	No	No	Abdominal pain	None	Singleton ES	TWIST
AID108	P111	Undiagnosed	13 years	Male	Non consanguineous	Autoinflammatory disorder	Yes	Yes	Yes	No	No	No	No	No	-	Both ESR and CRP	Singleton ES	TWIST
AID111	P114	Undiagnosed	7 years	Female	Non consanguineous	Behcet's disease	Yes	Yes	Yes	No	No	No	No	No	-	Both ESR and CRP	Singleton ES	TWIST
AID112	P115	Undiagnosed	19 years	Male	Non consanguineous	SOJIA	Yes	Yes	Yes	No	No	No	No	Yes	Joint contractures	Both ESR and CRP	Singleton ES	TWIST
AID114	P117	Undiagnosed	5 years 11 months	Female	Non consanguineous	SOJIA	Yes	Yes	Yes	No	No	No	No	Yes	Joint swelling	Both ESR and CRP	Singleton ES	TWIST
AID118	P120	Undiagnosed	4 years	Male	Non consanguineous	PFAPA	Yes	Yes	Yes	No	No	No	Yes	No	Abdominal pain	Both ESR and CRP	Singleton ES	TWIST
AID120	P123	Undiagnosed	4 years 6 months	Female	Not available	PFAPA	Yes	Yes	No	Yes	No	No	No	No	-	Both ESR and CRP	Singleton ES	TWIST
AID125	P129	Undiagnosed	10 years	Male	Non consanguineous	SLE	Yes	No	No	Yes	No	No	No	No	Lupus	Both ESR and CRP	Singleton ES	TWIST
AID126	P130	Undiagnosed	5 years	Female	Non consanguineous	Blau syndrome	Yes	Yes	No	No	Yes	No	No	No	-	Both ESR and CRP	Singleton ES	TWIST
AID127	P131	Undiagnosed	4 years	Female	Non consanguineous	CRMO	Yes	Yes	Yes	No	No	No	No	No	Osteomyelitis	Both ESR and CRP	Singleton ES	TWIST
AID129	P132	Undiagnosed	7 years	Male	Non consanguineous	Deficiency of ADA2	Yes	No	No	No	No	Yes	No	No	-	Both ESR and CRP	Duo ES	TWIST
AID131	P134	Undiagnosed	5 years	Female	Non consanguineous	PFAPA	Yes	No	No	No	No	No	Yes	No	-	Both ESR and CRP	Singleton ES	TWIST
AID133	P136	Undiagnosed	4 years	Female	Non consanguineous	FMF	Yes	Yes	Yes	No	No	No	No	No	-	Both ESR and CRP	Singleton ES	TWIST
AID134	P137	Undiagnosed	53 years	Male	Non consanguineous	VEXAS syndrome	Yes	Yes	No	No	No	No	No	No	-	Both ESR and CRP	Singleton ES	TWIST
AID136	P139	Undiagnosed	11 years	Male	Non consanguineous	Behcet's disease	Yes	Yes	No	Yes	Yes	No	No	No	-	Both ESR and CRP	Singleton ES	TWIST
AID137	P140	Undiagnosed	13 years	Male	Non consanguineous	SOJIA	Yes	Yes	No	No	No	No	No	Yes	Pericardial effusion	None	Singleton ES	TWIST
AID139	P142	Undiagnosed	7 years	Female	Non consanguineous	Monogenic lupus	Yes	Yes	Yes	No	No	No	Yes	No	SLE	ESR	Singleton ES	TWIST
AID140	P143	Undiagnosed	10 years	Male	Non consanguineous	Autoinflammatory disorder	Yes	No	No	No	No	No	No	No	-	Both ESR and CRP	Singleton ES	TWIST
AID141	P144	Undiagnosed	16 years	Male	Non consanguineous	Cutaneous PAN	Yes	Yes	No	No	No	No	No	No	-	Both ESR and CRP	Singleton ES	TWIST
AID142	P145	Undiagnosed	7 years	Male	Non consanguineous	Autoinflammatory disorder	Yes	No	No	No	No	No	No	No	Retinal vasculitis, myalgia	Both ESR and CRP	Singleton ES	TWIST
AID143	P146	Undiagnosed	11 years	Male	Non consanguineous	SOJIA	Yes	Yes	No	No	Yes	No	Yes	No	-	Both ESR and CRP	Singleton ES	TWIST
AID144	P147	Undiagnosed	11 years	Female	Non consanguineous	CACP syndrome	Yes	Yes	No	No	No	No	No	No	Joint deformity	Both ESR and CRP	Singleton ES	TWIST
AID145	P148	Undiagnosed	3 years	Male	Non consanguineous	Periodic fever syndrome	Yes	No	No	No	No	No	Yes	No	-	Both ESR and CRP	Singleton ES	TWIST
AID147	P150	Undiagnosed	3 years	Female	Non consanguineous	SOJIA	Yes	Yes	Yes	No	No	No	No	No	-	Both ESR and CRP	Singleton ES	TWIST
AID148	P151	Undiagnosed	9 years 10 months	Female	Non consanguineous	Juvenile sarcoidosis	Yes	Yes	Yes	No	Yes	No	Yes	Yes	Abdominal distension	Both ESR and CRP	Trio ES	TWIST
AID149	P152	Undiagnosed	75 years	Male	Non consanguineous	Autoinflammatory disorder	Yes	No	No	No	No	No	No	No	-	Both ESR and CRP	Singleton ES	TWIST
AID150	P153	Undiagnosed	11 years	Male	Non consanguineous	Deficiency of ADA2	Yes	Yes	Yes	No	No	Yes	No	No	Digital gangrene	Both ESR and CRP	Singleton ES	TWIST
AID152	P155	Undiagnosed	6 years	Male	Non consanguineous	Monogenic lupus	Yes	Yes	Yes	No	No	No	Yes	Yes	-	Both ESR and CRP	Singleton ES	TWIST
AID154	P157	Undiagnosed	28 years	Female	Non consanguineous	Deficiency of ADA2	Yes	Yes	Yes	No	No	No	No	No	-	Both ESR and CRP	Singleton ES	TWIST
AID155	P158	Undiagnosed	9 years	Male	Non consanguineous	Autoinflammatory disorder	Yes	Yes	No	No	No	No	No	No	-	Both ESR and CRP	Singleton ES	TWIST
AID156	P159	Undiagnosed	6 years	Female	Non consanguineous	SOJIA	Yes	Yes	Yes	No	No	No	Yes	No	-	Both ESR and CRP	Singleton ES	TWIST
AID157	P160	Undiagnosed	24 years	Female	Not available	Autoinflammatory disorder	Yes	No	Yes	No	No	No	No	No	-	Both ESR and CRP	Trio ES	TWIST
AID158	P161	Undiagnosed	2 years	Female	Non consanguineous	Monogenic lupus	Yes	Yes	Yes	Yes	No	No	No	No	Lupus	Both ESR and CRP	Singleton ES	TWIST
AID159	P162	Undiagnosed	23 years	Male	Non consanguineous	Polyarteritis nodosa	Yes	No	Yes	No	No	Yes	No	No	Abdominal pain	Both ESR and CRP	Singleton ES	TWIST
AID160	P163	Undiagnosed	18 years	Female	Non consanguineous	Interferonopathy	Yes	No	No	No	No	No	No	Yes	Infantile hemiplegia	Both ESR and CRP	Singleton ES	TWIST
AID161	P164	Undiagnosed	1 year 7 months	Female	Consanguineous	Autoinflammatory disorder	Yes	No	No	No	No	No	No	No	Discharge of pus from digits/toes	ESR	Singleton ES	TWIST
AID162	P165	Undiagnosed	24 years	Female	Consanguineous	Autoinflammatory disorder	Yes	No	No	No	No	No	No	No	-	Both ESR and CRP	Singleton ES	TWIST
AID164	P167	Undiagnosed	8 years	Female	Non consanguineous	Autoinflammatory disorder	Yes	Yes	No	No	No	No	No	No	-	Both ESR and CRP	Singleton ES	TWIST
AID167	P170	Undiagnosed	11 years	Male	Non consanguineous	Autoinflammatory disorder	Yes	Yes	Yes	No	No	No	No	No	-	CRP	Singleton ES	TWIST
AID168	P171	Undiagnosed	1 year 6 months	Male	Non consanguineous	Deficiency of ADA2	Yes	Yes	No	No	No	No	No	No	-	Both ESR and CRP	Singleton ES	TWIST
AID169	P172	Undiagnosed	6 years	Male	Non consanguineous	Autoinflammatory disorder	Yes	No	Yes	No	No	No	Yes	No	Abdominal pain	CRP	Trio ES	TWIST
AID170	P173	Undiagnosed	6 years	Male	Non consanguineous	Behcet's disease	Yes	Yes	Yes	Yes	Yes	No	Yes	No	Abdominal pain	CRP	Trio ES	TWIST
AID171	P174	Undiagnosed	5 years	Female	Non consanguineous	Monogenic SLE	Yes	Yes	No	No	No	No	No	No	Lupus	Both ESR and CRP	Singleton ES	TWIST
AID173	P176	Undiagnosed	3 years	Female	Non consanguineous	Early onset IBD	Yes	No	No	No	No	No	No	No	IBD	Not available	Trio ES	TWIST
AID174	P177	Undiagnosed	50 years	Male	Non consanguineous	Autoinflammatory disorder	Yes	No	No	No	No	No	No	No	-	Not available	Singleton ES	TWIST
AID175	P178	Undiagnosed	7 years	Female	Non consanguineous	Autoinflammatory disorder	Yes	Yes	No	No	No	No	No	Yes	-	Not available	Trio ES	TWIST
AID176	P179	Undiagnosed	9 years	Male	Not available	Deficiency of ADA2	Yes	Yes	No	No	No	No	No	Yes	Non-healing ulcer, joint contractures	None	Singleton ES	TWIST
AID178	P180	Undiagnosed	35 years	Male	Non consanguineous	Deficiency of ADA2	Yes	No	No	No	No	Yes	No	Yes	-	Both ESR and CRP	Singleton ES	TWIST
AID179	P181	Undiagnosed	20 years	Female	Non consanguineous	Autoinflammatory disorder	Yes	Yes	Yes	No	No	No	No	No	Joint contractures	Both ESR and CRP	Singleton ES	TWIST
AID180	P182	Undiagnosed	5 years	Male	Consanguineous	Monogenic lupus	Yes	Yes	No	No	No	No	No	No	Lupus nephritis	Both ESR and CRP	Singleton ES	TWIST
AID181	P183	Undiagnosed	7 years	Female	Non consanguineous	Polyarteritis nodosa	Yes	Yes	No	No	Yes	Yes	No	No	-	Both ESR and CRP	Singleton ES	TWIST
AID182	P184	Undiagnosed	10 years	Male	Consanguineous	COPA syndrome	Yes	No	No	No	No	No	No	Yes	Abdominal pain, grade 2 clubbing of fingers and toes	Both ESR and CRP	Singleton ES	TWIST
AID183	P185	Undiagnosed	36 years	Female	Not available	Autoinflammatory disorder	Yes	No	No	No	Yes	Yes	No	No	-	Both ESR and CRP	Trio ES	TWIST
AID185	P187	Undiagnosed	9 years	Male	Non consanguineous	Inborn error of immunity	Yes	No	No	No	Yes	No	Yes	Yes	-	ESR	Singleton ES	TWIST
AID186	P188	Undiagnosed	8 years	Male	Non consanguineous	SOJIA	Yes	Yes	Yes	Yes	No	No	No	No	-	ESR	Singleton ES	TWIST
AID187	P189	Undiagnosed	12 years	Female	Consanguineous	Behcet's disease	Yes	No	No	Yes	No	No	No	No	-	Both ESR and CRP	Singleton ES	TWIST
AID188	P190	Undiagnosed	3 years	Male	Non consanguineous	Recurrent fever	Yes	No	No	No	No	No	Yes	No	-	CRP	Singleton ES	TWIST
AID189	P191	Undiagnosed	35 years	Male	Non consanguineous	COPA syndrome	Yes	Yes	No	No	No	No	No	Yes	-	Both ESR and CRP	Singleton ES	TWIST
AID190	P192	Undiagnosed	14 years	Female	Non consanguineous	Autoinflammatory disorder	Yes	No	Yes	Yes	No	No	No	No	-	Both ESR and CRP	Singleton ES	TWIST
AID193	P195	Undiagnosed	2 years	Female	Non consanguineous	Inflammatory bowel disease	Yes	No	No	No	No	No	No	No	IBD	None	Singleton ES	TWIST
AID194	P196	Undiagnosed	8 years	Male	Consanguineous	SLE	Yes	No	Yes	No	No	No	Yes	Yes	SLE	None	Singleton ES	TWIST
AID198	P198	Undiagnosed	12 years	Male	Consanguineous	Deficiency of ADA2	Yes	Yes	Yes	No	No	Yes	No	No	-	ESR	Singleton ES	TWIST
CRC706	P202	Undiagnosed	3 years	Female	Consanguineous	Monogenic lupus	Yes	No	Yes	No	No	No	No	Yes	-	CRP	Singleton ES	TWIST
CRC707	P203	Undiagnosed	6 years	Male	Non consanguineous	Localized scleroderma with calcinosis	Yes	Yes	Yes	No	No	No	No	No	Joint contractures	None	Singleton ES	TWIST
CRC708	P204	Undiagnosed	4 years	Male	Non consanguineous	Infantile onset IBD	Yes	No	No	No	No	No	No	No	IBD	None	Singleton ES	TWIST
CRC734	P205	Undiagnosed	5 years	Female	Non consanguineous	Early onset SLE	Yes	No	No	Yes	No	No	Yes	Yes	Eyelid swelling, SLE	Both ESR and CRP	Trio ES	TWIST
